STUDY PROTOCOL

# Characterizing the influence of racism-related stress and pandemic-related changes in social connections on cardiovascular health: Study protocol and theoretical framework

Jewel Scott<sup>1\*</sup>, Victoria Money<sup>2</sup>, Charles Ellis<sup>3</sup>, Chanita Hughes-Halbert<sup>4</sup>, Michelle A. Birkett<sup>5</sup>, Gayenell Magwood<sup>1</sup>

**1** Department of Biobehavioral Health & Nursing Science, University of South Carolina College of Nursing, Columbia, South Carolina, United States of America, **2** Department of Sociology, University of South Carolina, Columbia, South Carolina, United States of America, **3** Department of Speech, Language, and Hearing Sciences, Communication Equity and Outcomes Laboratory, College of Public Health and Health Professions, University of Florida, Gainesville, Florida, United States of America, **4** Department of Population and Public Health Sciences, University of Southern California, Columbia, South Carolina, United States of America, **5** Department of Medical Social Sciences and Center for Computational and Social Sciences in Health (COMPASS), Northwestern University, Evanston, Illinois, United States of America

\* [jewelscott@sc.edu](mailto:jewelscott@sc.edu)

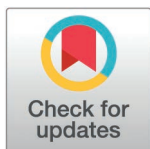

## OPEN ACCESS

**Citation:** Scott J, Money V, Ellis C, Hughes-Halbert C, Birkett MA, Magwood G (2025) Characterizing the influence of racism-related stress and pandemic-related changes in social connections on cardiovascular health: Study protocol and theoretical framework. PLoS One 20(7): e0324839. <https://doi.org/10.1371/journal.pone.0324839>

**Editor:** Noah Hammarlund, University of Florida, UNITED STATES OF AMERICA

**Received:** February 27, 2025

**Accepted:** April 30, 2025

**Published:** July 17, 2025

**Copyright:** © 2025 Scott et al. This is an open access article distributed under the terms of the [Creative Commons Attribution License](https://creativecommons.org/licenses/by/4.0/), which permits unrestricted use, distribution, and reproduction in any medium, provided the original author and source are credited.

**Data availability statement:** Some of the datasets generated and analyzed during the current study will contain sensitive relational information and are not publicly available due to privacy and confidentiality considerations.

## Abstract

### Background

Cardiovascular-related morbidity and mortality among young adults are rising, and disparities between young Black and White women are immense. Health behaviors including physical activity and diet are essential for optimal cardiovascular health. Psychosocial factors, such as racism, perceived stress, and lack of social support, contribute to racial inequities in cardiovascular disease, which were further exacerbated by the COVID-19 pandemic. The proposed study aims to assess the influence of racism-related stress and other social determinants of health, including social connectedness, on quality of life and cardiovascular-related health behaviors.

### Methods

This is a concurrent, triangulation, mixed-methods study combining survey data on health behaviors, psychosocial stressors, and social networks with a thematic analysis of focus group data. Participants will be people who self-identify as Black or African American woman, between the ages of 18 and 39, residing in the southeastern United States with at least one cardiovascular disease risk factor. The primary outcome is physical activity and quality of life.

Requests for limited access to de-identified or aggregated data may be considered by the corresponding author or the data safety committee (contact: Jill Newman, [newmanji@musc.edu](mailto:newmanji@musc.edu)) upon reasonable request and with appropriate data use agreements in place.

**Funding:** Research reported in this publication was supported by the National Institute Of Nursing Research of the National Institutes of Health under Award Numbers R01NR020127 and R01NR020127-03S1. The content is solely the responsibility of the authors and does not necessarily represent the official views of the National Institutes of Health. The funder had no role in the study design, data collection and analysis, decision to publish, or preparation of the manuscript. <https://www.ninr.nih.gov/>.

**Competing interests:** The authors have declared that no competing interests exist.

## Discussion

The results will be informative for developing an action plan for improving cardiovascular health at a network and community-level to mitigate the predicted post-pandemic increase in cardiovascular disease. This study will provide an integrated perspective of the influence of the COVID-19 pandemic on quality of life and social relationships with implications for cardiovascular health equity.

## Introduction

Cardiovascular disease (CVD) continues to be the leading cause of death and accounts for nearly 20% of deaths that occur before age 65 in the U.S. [1]. However, CVD onset and diagnosis occur years earlier, on average at 54 years of age for women per data from National Health and Nutrition Examination Surveys [2]. A closer look at the data reveals the mean age of CVD diagnosis for Black women is 6 years earlier than White women (56 years vs 50 years) [2], consistent with the racial disparities in other related outcomes such as stroke [3–5]. In addition, there are regional disparities, with the American South having the highest prevalence of heart disease and stroke in the U.S. [3,6,7].

CVD risk factors, such as hypertension, hyperlipidemia, or obesity, typically develop long before disease onset and death. An analysis of National Inpatient data on young adults (18–59 years of age) experiencing their first myocardial infarction found that 20% of deaths occurred in those aged 18–44, with 90% of these individuals having at least one risk factor [8]. Furthermore, disparities exist both within and across racial groups, with conditions like hypertension, diabetes, and obesity, being more prevalent among Black women compared to Black men and White women [5,8].

Maintaining a healthy diet and engaging in regular physical activity (PA) are key behaviors for reducing CVD risk and promoting optimal cardiovascular health (CVH). However, these behaviors are greatly influenced by the social environment and psychosocial stress. Discrimination, perceived stress, and lack of social support are examples of environmental and psychosocial factors associated with not meeting the recommended guidelines for PA and other CVH behaviors [9–12]. Among Black women, research suggests that chronic psychosocial stress, and related diet-based coping and fatigue, present significant barriers to engaging in sustained health-promoting behaviors [9,10,13]. Understanding these challenges will be critical for developing effective interventions that support lifelong cardiovascular health.

The COVID-19 pandemic was a universal stressor, albeit the intensity of the stress exposure and related consequences varied along racial, economic, and generational lines [14,15]. Many people employed in entry-level and service occupations disproportionately held by young people of color were not able to adjust their work schedule to work from home, contributing to the disproportionate burden of COVID-19 infection among Black young adults. Millennial adults (ages 26–41 in 2022) reported more behavioral-based coping, including increased junk food intake and more sedentary behaviors than older generations [16]. Moreover, today's youth and young adults are

more obese, have more chronic diseases, and report greater psychosocial distress than previous generations [17,18]. For many young Black women, the confluence of pandemic-related stress and social upheaval resulting from the spotlight on racism in America compounded their pandemic-related stress. Among Black women, the most common approach for coping with stress, specifically related to racism, is collective coping—such as seeking support from social connections [19–21]. The COVID-19 pandemic shifted many social relationships and it is unclear whether social connections are rebounding, and what impact these changes may have on CVH.

Social connections, and the support they provide, are important for CVH. Many studies have examined aspects of social relationships, such as social connectedness or social support, and most identify the protective benefits of positive social connections on stress-related biomarkers (e.g., inflammation), hypertension, and health behaviors such as physical activity [22–27]. For example, in the Jackson Heart Study, having social connections that could be counted on for practical assistance (e.g., functional social support) was associated with a lower incidence of hypertension, but the number of connections was not [24]. However, at least one study identified generational differences in the relationship between social connections and distress related to stressful life events [28]. Child and colleagues [28] found that social connections were especially helpful for late-middle aged adults, but not young adults among a sample of California residents. These findings are striking, and merit further investigation in the context of COVID-19.

The COVID-19 pandemic was a once in a lifetime stressor, that was further complicated by the heightened awareness of racial discrimination, illuminating the well-known link between racism and disease conditions. The ubiquity of the pandemic and the floodlight on health inequities and racism, coupled with social distancing protocols to contain the rise in infections, may have frayed social connections or exhausted the reserve capacity of social networks. Thus, the overall objective of the research study is to explore the structural, social, and pandemic-related factors influencing the quality of life and CVH behaviors of young adult Black women. We aim to answer the following two research questions: 1) How does pandemic-related change in social connections relate with current quality of life and CVH Behaviors of young Black women? and 2) What is the relationship between racial trauma, an intermediate structural determinant of health, and health-related quality of life and CVH behaviors among young Black women? The study is guided by frameworks on the impact of social determinants of health on CVD, prevention science, social science and social network theories [29–33].

Fig 1 presents a broad conceptual framework derived from several published frameworks and depicts how social connections can be influential for promoting CVH equity for young Black women. The concepts examined in the current study are underlined. Recent work has critically evaluated how structural and social factors that are shaped by the

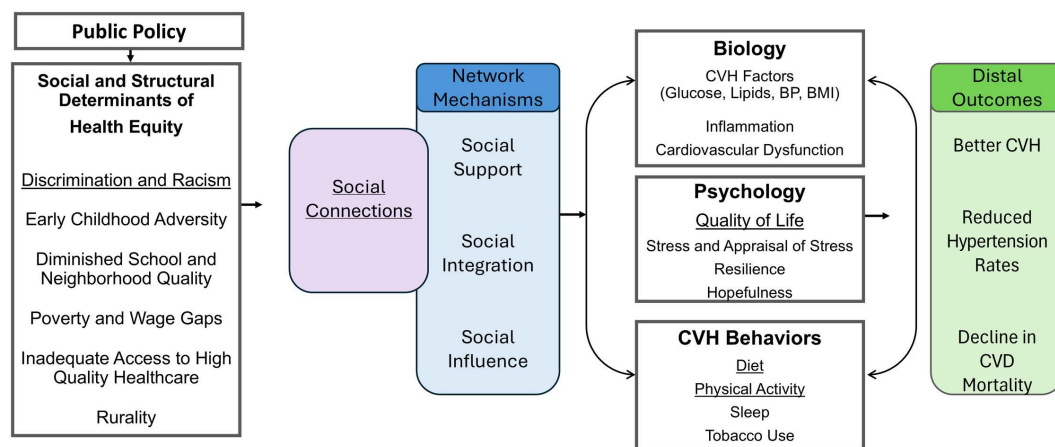

**Fig 1. Conceptual framework for the role of social relationships and cardiovascular health equity.**

<https://doi.org/10.1371/journal.pone.0324839.g001>

application of laws and policies have a trickle-down effect on the CVH of individuals [29]. Compelling evidence links structural and social determinants of health to cardiovascular and other health outcomes, through physiological processes including inflammation [29,34,35]. Stressful circumstances activate the biological stress-response system, particularly the hypothalamus-pituitary-adrenal (HPA) axis and sympathetic nervous system. While acute stress responses, such as increases in inflammation, are adaptive and protective in the short term (in response to danger or illness), chronic exposure to stressors (such as economic hardship, discrimination, or neighborhood disadvantage) leads to dysregulated HPA axis activity and persistent low-grade inflammation. This prolonged exposure to inflammatory cytokines contributes to endothelial dysfunction, arterial stiffness, and the development of atherosclerosis and hypertension [29,36]. This is one way structural and social determinants become biologically embedded contributing to inequities in CVH [34,35,37]. The examples of structural and social determinants of health in Fig 1 are not exhaustive, but provide illustrations that are especially relevant at the developmental stage of emerging and young adulthood [38].

This framework outlines the hypothesized pathways through which social connectedness and social networks influence cardiovascular health outcomes. Social connectedness operates through key network mechanisms and affects intermediate outcomes, including biological processes, psychological well-being, and health behaviors. These intermediate pathways ultimately contribute to distal cardiovascular health outcomes. CVH = cardiovascular health; CVD = cardiovascular disease

Social connections and the access to resources they provide can be considered a social determinant of health. In fact, the Solar and Irwin model of SDOH that was adapted by the World Health Organization (WHO) situates social connections in a unique position of crossing multiple determinants of health [39]. Social networks enable us to think of social connections in a dynamic way, critically assessing the interdependencies between the network's structure (e.g., size), the characteristics of individuals within the network, and the dynamics of relationships between individuals or groups that may influence behaviors and related health outcomes. Social connections (e.g., ties) being individuals or groups can act as pathways or barriers to health outcomes, and potentially buffer the detrimental effects of negative social experiences such as poverty or discrimination [30,31,33,40]. Using social networks to measure not only individual behaviors but also the influence of network properties on CVH opens opportunities to critically explore how social connections influence CVH outcomes through various psychosocial mechanisms such as social support, social integration, and social influence [31,33]. Social support, such as emotional or instrumental assistance from others, can buffer stress by reducing perceived burdens and enhancing coping capacity, potentially lowering cardiovascular risk. Social integration, which refers to the extent of participation in a network, promotes a sense of belonging that can mitigate stress and encourage healthy behaviors, such as regular physical activity or adherence to medical advice. Social influence, or the norms and behaviors modeled within a network, can shape lifestyle choices, such as diet or physical activity, which directly impact cardiovascular health [22,41,42].

Lastly, a prevention science lens complements the SDOH framework with an emphasis on the role of policy to effectively address how resources are distributed within a population, structural and social determinants of health including racism and discrimination [32]. This approach integrates a focus on upstream determinants, such as economic and social policies, with strategies to mitigate the downstream effects of structural inequities on CVH, consistent with the WHO SDOH framework.

## Materials and methods

### Study design

This is an ongoing, cross-sectional, concurrent triangulation mixed methods study that will provide insight into the status of CVH behaviors of young Black women in the post-peak phase of the COVID-19 pandemic. An advantage of the concurrent triangulation design is the equal weighting of the quantitative and qualitative data (Fig 2) [43]. In part one, participants complete survey measures about medical history, COVID-19 related experiences, health behaviors, and racial stress. In

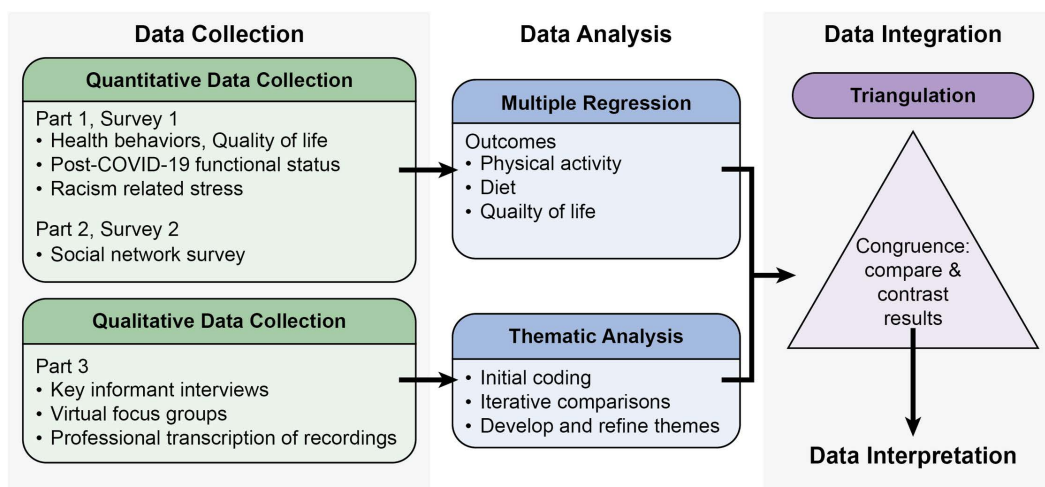

**Fig 2. Mixed methods study design.**

<https://doi.org/10.1371/journal.pone.0324839.g002>

part two, participants complete an online social network survey, and part 3 consists of the collection of qualitative data via key informant interviews and focus groups.

This study uses a concurrent triangulation approach, in which quantitative and qualitative data are collected and analyzed simultaneously to provide a comprehensive understanding of factors influencing physical activity, diet, and quality of life post-COVID-19. Data sources will be weighted equally and integrated during interpretation to validate findings and enhance the depth and credibility of the results.

The University of South Carolina Institutional Review Board reviewed and approved this study. The study was determined to be a minimal risk study and a waiver of written informed consent was obtained. Documentation of consent is provided by the participants reviewing information about the research and clicking a button affirming their intent to participate. They are also provided with the option to request to speak with the research team if they have questions about the study. This process is in line with the Office of Human Research Protections 2015 recommended guidance on minimal risk research and informed consent [44].

## Study sample and recruitment

In collaboration with existing partnerships with community-based organizations, we will recruit 100 women who self-identify as Black or African American. In addition, recruitment will occur through presentations to community and faith-based organizations (e.g., community health centers), Black sororities, and directed advertisements on social media. The inclusion criteria are: 1) self-identify as a Black or African-American woman, 2) between the ages of 18 and 39, 3) history of a diagnosed COVID-19 infection, 4) Speak and understand English, 5) reside in the southeastern U.S. defined as North Carolina, South Carolina, or Georgia, and 5) are at risk of developing CVD [45,46]. To identify the presence of a CVD risk factor we modified the Centers for Disease Control prediabetes risk screening to include sex-specific risks of gestational diabetes and hypertensive disorders of pregnancy [47]. People were excluded if they are currently pregnant because health behaviors such as sleep, or physical activity may be disrupted during pregnancy. Individuals who respond to advertisements complete an online screener to determine eligibility. Screening, consent, and survey data collection are completed using Redcap (Research Electronic Data Capture), a secure, web-based software platform designed to support data capture for research studies [48,49]. Participant recruitment began on March 31, 2024, and is anticipated to be completed by July 1, 2025. Data collection is estimated to be completed by August 30, 2025, and the analysis will be completed by Spring 2026.



## Measures

Participants will complete sociodemographic questionnaires and validated surveys about quality of life, post-COVID-19 functional status, physical activity, diet, and social determinants of health (e.g., experiences of racism) (Table 1). Following this, they will complete an online social network survey to understand how their social relationships have changed since the pandemic and to characterize the social networks young Black women activate to discuss health and important matters, including racial stress.

## Primary outcome

Physical activity is the primary outcome due to strong evidence supporting its anti-inflammatory and mood-enhancing properties, which are important for regulating stress and improving CV health. Physical Activity (PA) will be measured with the short-form International Physical Activity Questionnaire (IPAQ-SF) which elicits moderate and vigorous PA over the previous 7 days. The IPAQ is the most widely used subjective measure of PA, including previous use with Black women [50,51].

## Secondary outcomes

Diet and quality of life are the secondary outcomes. Diet will be assessed using the Mediterranean Eating Patterns for Americans (MEPA), a 16-item scale recommended by the American Heart Association (AHA) to assess diet that promotes CVH [52]. Health related quality of life (HRQOL) is a patient-centered metric that correlates with physical and mental

**Table 1. Key study measures.**

|                                                                                                                   |
|-------------------------------------------------------------------------------------------------------------------|
| <b>Health Behaviors</b>                                                                                           |
| Physical Activity – International Physical Activity Questionnaire (IPAQ)                                          |
| Diet – Mediterranean Eating Pattern for Americans (MEPA)                                                          |
| Quality of Life – PROMIS v1.2 Global Health Scale                                                                 |
| <b>Social Connections</b>                                                                                         |
| UCLA Isolation 3-item                                                                                             |
| Item from Post-Covid-19 Functional Survey                                                                         |
| Social Network Survey                                                                                             |
| Network Size                                                                                                      |
| Network Density                                                                                                   |
| Perceived Change in Communication with Network – Proportion of Network with less communication after the pandemic |
| Proportion of Network Available to Discuss Health                                                                 |
| Network Strain                                                                                                    |
| <b>Discrimination and Racism</b>                                                                                  |
| Index of Racism Related Stress                                                                                    |
| Racism Related Vigilance                                                                                          |
| Everyday Discrimination Scale                                                                                     |
| <b>Sociodemographic and Clinical Characteristics</b>                                                              |
| Age                                                                                                               |
| Education Level                                                                                                   |
| Income                                                                                                            |
| Center for Epidemiologic Studies Depression (CES-D) Scale                                                         |
| Promis Short Form -Emotional Distress-Anxiety Scale                                                               |
| Post-COVID-19 functional status (Yorkshire Rehabilitation Scale)                                                  |

<https://doi.org/10.1371/journal.pone.0324839.t001>

health [53], and Black women often have lower HRQOL than women of other racial and ethnic groups [54]. After Covid-19, HRQOL also varies based on history of infection, severity of infection, gender, and comorbidities [55,56]. We measure HRQOL using the 10-item PROMIS Global Health scale [53].

## Exposures

We assess pandemic-related changes in social connections via a single item from the COVID-19 Yorkshire Rehabilitation Scale that asks participants to rate their problems with socializing and interacting with friends before COVID-19 and post-COVID-19 using a 4-point Likert scale [57]. Social connections are also measured using data from the rigorous social network survey. Three name generators were used to compile personal networks for each participant: 1. Who are the people in your life with whom you discuss important matters?, 2. Name the people with whom you socialize routinely, and 3. Who do you talk to about your physical or mental health?. For each person named, they indicate how often they are in communication, whether it has changed since the COVID-19 pandemic, and whether each person named is connected to each other. Table 1 includes the social network metrics that will be evaluated for their relationship with quality of life and CVH behaviors. Structural characteristics, such as network size and network density, are commonly used in networks and health literature to provide information about the possible flow of resources and information [22,33,41,58,59]. Perceived change in communication – more, same, less, is available for each network member. We will examine the proportion of the network with less communication post-pandemic. Functional characteristics of networks also shape health behaviors, such as providing support for behavioral change. We will explore discussions of health within the network and perceived hassles or strain as potential facilitators or barriers to engaging in physical activity and consuming a heart healthy diet.

Racism will be measured using the Everyday Discrimination Scale adjusted to ask specifically about how often they encountered the list of experiences due to their race or ethnicity [60]. Participants indicate if they experienced it, and the frequency of the discrimination. To capture traumatic aspects of racism, we include a 6-item measure of racism-related vigilance derived from the Chicago Health study which has been used by other researchers [61,62].

To measure racial stress, the Index of Race-Related Stress (IRRS)-Brief Version was adapted for use in a social network survey [63]. The IRRS asks about exposure to racial stress across three dimensions; interpersonal, institutional, and cultural racism. Participants indicate whether they have experienced a specific stress and their reaction to the experience on a 4-item Likert scale ranging from *it did not bother me (0) to being extremely upset (3)*. Next, participants indicate if the stressor was discussed with each person named (i.e., alter). To our knowledge, social network analysis has not previously been used to examine discussion of racial stress within networks, thus our findings will provide insights into this novel use of social network methods.

Data on sociodemographic and clinical characteristics will be collected to be included as covariates in statistical modeling given their potential influence on physical activity, diet, and quality of life. Age, education level and income are key sociodemographic characteristics, though education and income may not be modeled together due to their high correlation and limited statistical power. Clinical characteristics such as post-COVID-19 functional status (Yorkshire Rehabilitation Scale), comorbid conditions (e.g., hypertension, diabetes), and mental health status (CES-D and Promis Short Form -Emotional Distress-Anxiety Scale) will also be considered as they may impact engagement in health behaviors and overall well-being.

## Quantitative methods and analysis

We will analyze the independent impact of social drivers of health on total weekly minutes of moderate-vigorous physical activity using separate multiple regression models. A forward hierarchical regression approach will be used. The initial block of predictors (model 1) will be the social determinant of health (e.g., pandemic-related changes in social connections, racism, and racial stress) and community-level SSDH (e.g., social deprivation index and concentrated poverty). The second block of predictors (model 2) will add individual sociodemographic factors such as age, income, and

post-COVID-19 functional status because of their relationship with the outcome of physical activity. The forward hierarchical approach will be repeated for the secondary outcomes, diet and quality of life. In addition, the goodness of fit of the models will be examined by calculating the adjusted R-squares. We will also investigate the potential nonlinear relationship between the outcomes and the predictors by applying the polynomial regression models. Data management and visualizations of networks will be conducted using R. For network descriptive statistics and visualizations, the *igraph* and *ideanet* packages in R will be used.

### Sample size and power calculation

We estimate the number of participants to detect a 10–15-minute/week change in physical activity assessed with the IPAQ. Any increase in physical activity has cardiovascular benefits, but the goal of increasing physical activity by 5–10% of the recommended 150 minutes/week is the standard recommendation [64,65]. Anticipating a medium effect size ( $f^2 \approx 0.15$ ) and 5–8 independent variables, 55 participants are needed for regression analyses. As the recruitment target is 100 total participants and to retain a minimum of 65% of participants for the social network survey ( $n = 66$ ), thus we will be adequately powered for the primary analyses.

### Qualitative methods and analysis

Key informant interviews and focus groups will be conducted concurrently with the quantitative data collection to collect contextual data on the impact of the COVID-19 pandemic and stressors on health behaviors and quality of life. Key informant interviews ( $N = 3–5$ ) will be used to develop and refine the focus group interview guide. Based on the population and nature of the inquiry, we estimate thematic saturation will be achieved in three-four focus groups of 6–8 individuals each. The groups will be conducted using secure videoconference technology to allow the participant maximum flexibility to complete the focus group from their preferred location; reducing the participant burden related to travel. A video connection permits face-to-face communication which facilitates rapport building, essential for discussing potentially sensitive topics, such as racism. Audio recordings will be professionally transcribed.

Thematic analysis of the qualitative data will be used to identify patterns and extract commonalities from the data that are then grouped into themes. We will use inductive coding to derive the themes from the data, consistent with research focused on lived experiences as opposed to a researcher-driven critique. Transcripts will be coded by two independent coders, who will develop independent coding schemes iteratively using qualitative analysis software. Final coding schemes will be defined in collaboration with the investigator team, who will also adjudicate discrepancies.

### Data integration

To triangulate our findings, we will compare and contrast the themes from the qualitative analysis and the significant findings from the quantitative analysis to identify areas of congruence and contrast. Findings will be represented visually using a joint display technique. [Table 2](#) summarizes the quantitative and qualitative data available to answer each research question.

### Results

Final IRB approval was obtained in Spring 2024, and we began enrollment in March 2024. As of Fall 2024, we have enrolled 48 participants, and 39 have completed the study. Enrollment is ongoing until the targeted number is reached.

### Discussion

While impacts from the COVID-19 pandemic were felt around the world, the future impact on health outcomes may not affect all populations uniformly. The current study aims to understand the impact of the pandemic on young Black women



**Table 2. Research questions and available data.**

| Research Question                                                                                                                                                              | Related Quantitative data                                                                                                                                                                                                                                                                                                                                                                                                                                                                 | Related Qualitative data                                                                                                                                                                                                                                                                                            |
|--------------------------------------------------------------------------------------------------------------------------------------------------------------------------------|-------------------------------------------------------------------------------------------------------------------------------------------------------------------------------------------------------------------------------------------------------------------------------------------------------------------------------------------------------------------------------------------------------------------------------------------------------------------------------------------|---------------------------------------------------------------------------------------------------------------------------------------------------------------------------------------------------------------------------------------------------------------------------------------------------------------------|
| How does pandemic-related change in social connections relate with current HRQOL and CVH Behaviors of young Black women?                                                       | Exposures:<br>1.Change from pre-COVID and now – Problems with socializing/interacting with friends* or caring for dependents *related to your illness and not due to social distancing/lockdown measures – Covid-19 Yorkshire Rehabilitation Scale<br>2.Social Network Survey Network size and Change in communication with network members since the pandemic<br>Outcomes:<br>1.IPAQ Physical Activity<br>2.MEPA Diet<br>3.Health Related Quality of Life – PROMIS Global Health Measure | What comes to your mind when you think about how the Covid pandemic affected young Black women's quality of life?<br>We are now several years from when the pandemic started in 2020. How are you feeling about your social connections now?<br>Do you think the social connections are important for heart health? |
| What is the relationship between racial trauma, an intermediate structural determinant of health and health-related quality of life and CVH behaviors among young Black women? | Exposures:<br>1.Everyday Discrimination Scale<br>2.Index of Race-Related Stress<br>3.Social Network Survey – percentage of network engaged in discussions about racism related stress<br>Outcomes:<br>1.IPAQ Physical Activity<br>2.MEPA Diet<br>3.Health Related Quality of Life – PROMIS Global Health Measure                                                                                                                                                                          | Overlapping with the COVID-19 pandemic, many things happened to bring discussions about racism to the forefront. How has that impacted you personally?<br>What helps you to manage any feelings or emotions related to racism?                                                                                      |

HRQOL = Health Related Quality of Life, CVH = Cardiovascular Health; IPAQ = International Physical Activity Questionnaire, MEPA = Mediterranean Eating Pattern for Americans.

<https://doi.org/10.1371/journal.pone.0324839.t002>

given their history of excessive CVD risk above and beyond their peers, which may have worsened during the pandemic, coupled with stressors related to racism and other forms of discrimination. Further, COVID-19 infections, even mild (e.g., nonhospitalized) cases, are associated with declines in functioning (e.g., fatigue, shortness of breath, stress) that could hinder health behavior change and strain social support systems [66–68].

## Study implications

This innovative study focuses on cardiovascular health in young adulthood in a population at high risk of poor CVH and explores the potential for social connections to mitigate pandemic-related impacts on CVH. Completion of the study will provide new insights into the complexities of social relationships through the rigorous assessment of social networks. This is among the first studies to use social network analysis to explore the potential of social connections to mitigate the variety of stressors experienced by young adult Black women, including racial stress. The use of multiple methodologies will facilitate a deeper understanding of the opportunities to leverage the strengths of social relationships to address chronic disparities in CVD.

A rising trend in CVD mortality in the young adult population prompted multiple agencies (e.g., National Institutes of Health, American Academy of Nursing) to publish statements identifying the need to increase research that focuses on CVD prevention in young women [46,69,70]. Our focus on young Black women is responsive to these startling trends in CVD mortality. Moreover, the U.S. Surgeon General's 2023 report on the epidemic of loneliness and isolation reports on the association of social connections with cardiovascular outcomes and acknowledges the gap in knowledge related to longer term consequences among young adults [71].

## Strengths and limitations

This study asks about pandemic related changes in sleep, functional status, and social connection retrospectively. Thus, there is the risk of recall bias, and to a lesser extent, social desirability bias. In addition, the study includes a single assessment of social networks and racial stress; thus, the analysis is limited to a cross-sectional snapshot

of potential relationships between social connections and CVH. Relatedly, causality cannot be inferred from the cross-sectional data but should be a priority for future research investigating the impact of social connections at this critical developmental period on future CVH. In addition, the current study is restricted to young adult Black women in a region of the southeastern U.S., an area with a history notable for its strong connections with the transatlantic slave trade, Jim Crow South, and contemporary challenges with racial tensions and stress. While the findings are not generalizable to young adult Black women across the country, the experiences of young Black women in this region may provide insights into future research considerations for young Black women in the American South, a region plagued by a high prevalence of CVD, and potentially across the U.S., as racial stress is not limited to the Southeast.

The study includes a rigorous assessment of the social networks of young adult Black women, addressing a significant gap in the existing literature. Upon completion, the study will be one of the few to assess contemporary stressors, including racial stress, in relation to social networks using quantitative methods among young Black women. Moreover, the focus on a population that has chronically high rates of hypertension, CVD, and risk of stroke, but is under-represented in the literature on social relationships and health is a significant strength of the research protocol. Lastly, the mixed methods approach supports the synthesis of quantitative findings alongside lived experience and may identify areas of congruence as well as inconsistencies and gaps that can inform further observational and interventional research. Social networks exert their influence on health over time, so priorities for future research will include longitudinal follow-up to monitor how changes in social networks, especially during life transitions such as parenting, shape the cardiovascular health of young women. We look forward to opportunities to fund and collect such data, and to explore innovative analytical approaches including dyadic regression analyses or egocentric exponential random graph models (ERGMs) that do not require longitudinal data collection [72].

### Plans for dissemination

Results of the study will be circulated via community forums, research conferences, and peer-review publications. In the future, a community advisory board will be established to further guide the research and to provide input on community-based avenues for research dissemination. In addition, the findings will also serve as pilot data for extramural funding to develop the proposed solutions.

### Author contributions

**Conceptualization:** Jewel Scott, Gayenell Magwood.

**Data curation:** Jewel Scott, Victoria Money, Charles Ellis, Gayenell Magwood.

**Funding acquisition:** Jewel Scott, Gayenell Magwood.

**Investigation:** Jewel Scott, Charles Ellis, Chanita Hughes-Halbert.

**Methodology:** Jewel Scott, Victoria Money, Charles Ellis, Chanita Hughes-Halbert, Michelle A. Birkett, Gayenell Magwood.

**Project administration:** Jewel Scott, Gayenell Magwood.

**Resources:** Gayenell Magwood.

**Supervision:** Gayenell Magwood.

**Visualization:** Jewel Scott.

**Writing – original draft:** Jewel Scott.

**Writing – review & editing:** Jewel Scott, Victoria Money, Charles Ellis, Chanita Hughes-Halbert, Michelle A. Birkett, Gayenell Magwood.

## References

- Shah NS, Lloyd-Jones DM, Kandula NR, Huffman MD, Capewell S, O'Flaherty M. Adverse Trends in Premature Cardiometabolic Mortality in the United States, 1999 to 2018. *J Am Heart Assoc.* 2020;9(23):e018213.
- Lee K, Huang X, Wang MC, Shah NS, Khan SS. Age at Diagnosis of CVDs by Race and Ethnicity in the U.S., 2011 to 2020. *JACC Adv.* 2022;1(3).
- George MG, Tong X, Bowman BA. Prevalence of Cardiovascular Risk Factors and Strokes in Younger Adults. *JAMA Neurol.* 2017;74(6):695–703. <https://doi.org/10.1001/jamaneurol.2017.0020> PMID: 28395017
- Malek AM, Wilson DA, Turan TN, Mateus J, Lackland DT, Hunt KJ. Maternal Coronary Heart Disease, Stroke, and Mortality Within 1, 3, and 5 Years of Delivery Among Women With Hypertensive Disorders of Pregnancy and Pre-Pregnancy Hypertension. *J Am Heart Assoc.* 2021;10(5):e018155. <https://doi.org/10.1161/JAHA.120.018155> PMID: 33619981
- Martin SS, Aday AW, Allen NB, Almarzooq ZI, Anderson CAM, Arora P, et al. Heart disease and stroke statistics: A report of US and global data from the American Heart Association. *Circulation.* 2025.
- Parcha V, Kalra R, Suri SS, Malla G, Wang TJ, Arora G, et al. Geographic Variation in Cardiovascular Health Among American Adults. *Mayo Clin Proc.* 2021;96(7):1770–81. <https://doi.org/10.1016/j.mayocp.2020.12.034> PMID: 33775420
- Zheng Y, Wen X, Bian J, Zhao J, Lipkind HS, Hu H. Racial, Ethnic, and Geographic Disparities in Cardiovascular Health Among Women of Child-bearing Age in the United States. *J Am Heart Assoc.* 2021;10(17):e020138. <https://doi.org/10.1161/JAHA.120.020138> PMID: 34431309
- Yandrapalli S, Nabors C, Goyal A, Aronow WS, Frishman WH. Modifiable Risk Factors in Young Adults With First Myocardial Infarction. *J Am Coll Cardiol.* 2019;73(5):573–84. <https://doi.org/10.1016/j.jacc.2018.10.084> PMID: 30732711
- Woods-Giscombe CL, Lobel M, Zimmer C, Brooks J, Sheffield-Abdullah K, Bey G, et al. Use of Food to Cope With Culturally Relevant Stressful Life Events Is Associated With Body Mass Index in African American Women. *Nurs Res.* 2021;70(5S Suppl 1):S53–62. <https://doi.org/10.1097/NNR.0000000000000532> PMID: 34173375
- Fanelli Kuczmarski M, Cotugna N, Pohlig RT, Beydoun MA, Adams EL, Evans MK. Snacking and diet quality are associated with the coping strategies used by a socioeconomically diverse urban cohort of African-American and White adults. *Journal of the Academy of Nutrition and Dietetics.* 2017;117(9):1355–65.
- Joseph PV, Davidson HR, Boulineaux CM, Fourie NH, Franks AT, Abey SK, et al. Eating Behavior, Stress, and Adiposity: Discordance Between Perception and Physiology. *Biol Res Nurs.* 2018;20(5):531–40. <https://doi.org/10.1177/1099800418779460> PMID: 29852756
- Stults-Kolehmainen MA, Sinha R. The effects of stress on physical activity and exercise. *Sports Med.* 2014;44(1):81–121. <https://doi.org/10.1007/s40279-013-0090-5> PMID: 24030837
- Nies MA, Vollman M, Cook T. African American women's experiences with physical activity in their daily lives. *Public Health Nurs.* 1999;16(1):23–31. <https://doi.org/10.1046/j.1525-1446.1999.00023.x> PMID: 10074819
- Barr-Anderson DJ, Hazzard VM, Hahn SL, Folk AL, Wagner BE, Neumark-Sztainer D. Stay-at-Home Orders during COVID-19: The Influence on Physical Activity and Recreational Screen Time Change among Diverse Emerging Adults and Future Implications for Health Promotion and the Prevention of Widening Health Disparities. *Int J Environ Res Public Health.* 2021;18(24):13228. <https://doi.org/10.3390/ijerph182413228> PMID: 34948833
- Laster Pirtle WN. Racial capitalism: a fundamental cause of novel coronavirus (COVID-19) pandemic inequities in the United States. *Health Education & Behavior.* 2020;47(4):504–8.
- El-Gabalawy R, Sommer JL. "We Are at Risk Too": The Disparate Mental Health Impacts of the Pandemic on Younger Generations: Nous Sommes Aussi à Risque: Les Effets Disparates de la Pandémie Sur la Santé Mentale des Générations Plus Jeunes. *Can J Psychiatry.* 2021;66(7):634–44. <https://doi.org/10.1177/0706743721989162> PMID: 33522837
- Martinson ML, Lapham J, Ercin-Sweanger H, Teitler JO, Reichman NE. Generational Shifts in Young Adult Cardiovascular Health? Millennials and Generation X in the United States and England. *J Gerontol B Psychol Sci Soc Sci.* 2022;77(Suppl\_2):S177–88. <https://doi.org/10.1093/geronb/gbac036> PMID: 35195713
- DePew R, Gonzales G. Differences in health outcomes between millennials and generation x in the usa: Evidence from the national health interview survey. *Population Research and Policy Review.* 2020;39(3):605–16.
- Jacob G, Faber SC, Faber N, Bartlett A, Ouimet AJ, Williams MT. A systematic review of black people coping with racism: approaches, analysis, and empowerment. *Perspect Psychol Sci.* 2022. <https://doi.org/10.1177/17456916221100509>
- Spates K, Evans NTM, Watts BC, Abubakar N, James T. Keeping ourselves sane: A qualitative exploration of Black women's coping strategies for gendered racism. *Sex Roles.* 2020;82(9):513–24.
- Gillyard T, Davis J, Parham I, Moss J, Barre I, Alexander L. Psychosocial stressors and coping strategies among African Americans during early stages of the COVID-19 pandemic: a qualitative study. *J Racial Ethn Health Disparities.* 2022;:1–14.
- Child ST, Albert MA. Social Networks and Health Outcomes: Importance for racial and socioeconomic disparities in cardiovascular outcomes. *Curr Cardiovasc Risk Rep.* 2018;12(12):30. <https://doi.org/10.1007/s12170-018-0594-5> PMID: 36248194
- Serrano Fuentes N, Rogers A, Portillo MC. Social network influences and the adoption of obesity-related behaviours in adults: a critical interpretative synthesis review. *BMC Public Health.* 2019;19(1):1178.
- Harding BN, Hawley CN, Kalinowski J, Sims M, Muntner P, Young Mielcarek BA, et al. Relationship between social support and incident hypertension in the Jackson Heart Study: a cohort study. *BMJ Open.* 2022;12(3):e054812. <https://doi.org/10.1136/bmjopen-2021-054812> PMID: 35301208

25. Child S, Kaczynski AT, Moore S. Meeting Physical Activity Guidelines: The Role of Personal Networks Among Residents of Low-Income Communities. *Am J Prev Med*. 2017;53(3):385–91. <https://doi.org/10.1016/j.amepre.2017.04.007> PMID: [28601404](#)
26. Parker M, Self-Brown SR, Rahimi A, Fang X. Longitudinal Analysis of the Relationship Between Social Isolation and Hypertension in Early Middle Adulthood. *J Am Heart Assoc*. 2024;13(9):e030403. <https://doi.org/10.1161/JAHA.123.030403> PMID: [38619293](#)
27. Seeman TE, Gruenewald TL, Cohen S, Williams DR, Matthews KA. Social relationships and their biological correlates: Coronary Artery Risk Development in Young Adults (CARDIA) study. *Psychoneuroendocrinology*. 2014;43:126–38. <https://doi.org/10.1016/j.psyneuen.2014.02.008> PMID: [24703178](#)
28. Child ST, Lawton LE. Personal networks and associations with psychological distress among young and older adults. *Soc Sci Med*. 2020;246:112714.
29. Powell-Wiley TM, Baumer Y, Baah FO, Baez AS, Farmer N, Mahlobo CT, et al. Social Determinants of Cardiovascular Disease. *Circ Res*. 2022;130(5):782–99.
30. Holt-Lunstad J, Smith TB. Loneliness and social isolation as risk factors for CVD: implications for evidence-based patient care and scientific inquiry. *Heart*. 2016;102(13):987–9. <https://doi.org/10.1136/heartjnl-2015-309242> PMID: [27091845](#)
31. Klärner A, Gamper M, Keim-Klärner S, von der Lippe H, Moor I, Richter M. Social networks and health inequalities: A new perspective for research. In: Klärner A, Gamper M, Keim-Klärner S, Moor I, von der Lippe H, Vonneilich N, Editors. *Social networks and health inequalities: A new perspective for research*. Cham: Springer International Publishing. 2022. p. 1–22.
32. Biglan A, Prinz RJ, Fishbein D. Prevention Science and Health Equity: A Comprehensive Framework for Preventing Health Inequities and Disparities Associated with Race, Ethnicity, and Social Class. *Prev Sci*. 2023;24(4):602–12. <https://doi.org/10.1007/s11121-022-01482-1> PMID: [36757658](#)
33. Berkman LF, Glass T, Brissette I, Seeman TE. From social integration to health: Durkheim in the new millennium. *Soc Sci Med*. 2000;51(6):843–57. [https://doi.org/10.1016/S0277-9536\(00\)00065-4](https://doi.org/10.1016/S0277-9536(00)00065-4) PMID: [10972429](#)
34. Thimm-Kaiser M, Benzekri A, Guilamo-Ramos V. Conceptualizing the Mechanisms of Social Determinants of Health: A Heuristic Framework to Inform Future Directions for Mitigation. *Milbank Q*. 2023;101(2):486–526. <https://doi.org/10.1111/1468-0009.12642> PMID: [37062954](#)
35. Williams DR, Mohammed SA. Racism and health I: pathways and scientific evidence. *Am Behav Sci*. 2013;57(8).
36. McEwen BS. Stress, adaptation, and disease. Allostasis and allostatic load. *Ann N Y Acad Sci*. 1998;840:33–44. <https://doi.org/10.1111/j.1749-6632.1998.tb09546.x> PMID: [9629234](#)
37. Krieger N. Methods for the scientific study of discrimination and health: an ecosocial approach. *American Journal of Public Health*. 2012;102(5):936–45.
38. Scott J, Agarwala A, Baker-Smith CM, Feinstein MJ, Jakubowski K, Kaar J, et al. Cardiovascular Health in the Transition From Adolescence to Emerging Adulthood: A Scientific Statement From the American Heart Association. *Journal of the American Heart Association*. 2025:e039239.
39. Solar O, Irwin A. A conceptual framework for action on the social determinants of health. WHO Document Production Services. 2010.
40. Keim-Klärner S, Adebahr P, Brandt S, Gamper M, Klärner A, Knabe A, et al. Social inequality, social networks, and health: a scoping review of research on health inequalities from a social network perspective. *Int J Equity Health*. 2023;22(1):74. <https://doi.org/10.1186/s12939-023-01876-9> PMID: [37098617](#)
41. Nam S, Redeker N, Whitemore R. Social networks and future direction for obesity research: A scoping review. *Nurs Outlook*. 2015;63(3):299–317. <https://doi.org/10.1016/j.outlook.2014.11.001> PMID: [25982770](#)
42. Prochnow T, Patterson MS. Assessing Social Network Influences on Adult Physical Activity Using Social Network Analysis: A Systematic Review. *Am J Health Promot*. 2022;36(3):537–58. <https://doi.org/10.1177/08901171211060701> PMID: [34898289](#)
43. Creswell JW, Clark VLP. Designing and conducting mixed methods research. Sage publications. 2017.
44. Office for Human Research Protections (OHRP) DoHaHS. Recommended Guidance on Minimal Risk Research and Informed Consent 2015. Available from: <https://www.hhs.gov/oohp/sachrp-committee/recommendations/2015-september-28-attachment-a/index.html>
45. Marroush TS, Sharma AV, Botros B, Szpunar S, Rosman HS, Mehta RH. Differences in Baseline Characteristics and Outcomes in Young Caucasians and African Americans with Acute Myocardial Infarction. *Am J Med Sci*. 2021;361(2):238–43. <https://doi.org/10.1016/j.amjms.2020.09.004> PMID: [33054977](#)
46. Gooding HC, Gidding SS, Moran AE, Redmond N, Allen NB, Bacha F, et al. Challenges and Opportunities for the Prevention and Treatment of Cardiovascular Disease Among Young Adults: Report From a National Heart, Lung, and Blood Institute Working Group. *J Am Heart Assoc*. 2020;9(19):e016115. <https://doi.org/10.1161/JAHA.120.016115> PMID: [32993438](#)
47. Mosca L, Benjamin EJ, Berra K, Bezanson JL, Dolor RJ, Lloyd-Jones DM, et al. Effectiveness-based guidelines for the prevention of cardiovascular disease in women—2011 update: a guideline from the American Heart Association. *Circulation*. 2011;123(11):1243–62. <https://doi.org/10.1161/CIR.0b013e31820faaf8> PMID: [21325087](#)
48. Harris PA, Taylor R, Minor BL, Elliott V, Fernandez M, O'Neal L, et al. The REDCap consortium: Building an international community of software platform partners. *2019;95:103208*. <https://doi.org/10.1016/j.jbi.2019.103208> PMID: [31078660](#)
49. Harris PA, Taylor R, Thielke R, Payne J, Gonzalez N, Conde JG. Research electronic data capture (REDCap)—a metadata-driven methodology and workflow process for providing translational research informatics support. *J Biomed Inform*. 2009;42(2):377–81. <https://doi.org/10.1016/j.jbi.2008.08.010> PMID: [18929686](#)



50. Carter-Nolan PL, Adams-Campbell LL, Makambi K, Lewis S, Palmer JR, Rosenberg L. Validation of physical activity instruments: Black Women's Health Study. *Ethn Dis*. 2006;16(4):943–7. PMID: [17061751](https://doi.org/10.1186/1479-5868-8-115)
51. Lee PH, Macfarlane DJ, Lam TH, Stewart SM. Validity of the International Physical Activity Questionnaire Short Form (IPAQ-SF): a systematic review. *Int J Behav Nutr Phys Act*. 2011;8:115. <https://doi.org/10.1186/1479-5868-8-115> PMID: [22018588](https://pubmed.ncbi.nlm.nih.gov/22018588/)
52. Cerwinske LA, Rasmussen HE, Lipson S, Volgman AS, Tangney CC. Evaluation of a dietary screener: the Mediterranean Eating Pattern for Americans tool. *J Hum Nutr Diet*. 2017;30(5):596–603. <https://doi.org/10.1111/jhn.12451> PMID: [28168764](https://pubmed.ncbi.nlm.nih.gov/28168764/)
53. Hays RD, Bjorner JB, Revicki DA, Spritzer KL, Cella D. Development of physical and mental health summary scores from the patient-reported outcomes measurement information system (PROMIS) global items. *Qual Life Res*. 2009;18(7):873–80. <https://doi.org/10.1007/s11136-009-9496-9> PMID: [19543809](https://pubmed.ncbi.nlm.nih.gov/19543809/)
54. Pereira CC, Palta M, Mullahy J, Fryback DG. Race and preference-based health-related quality of life measures in the United States. *Quality of Life Research: An International Journal of Quality of Life Aspects of Treatment, Care and Rehabilitation*. 2011;20(6):969–78.
55. Li J, Wisnivesky JP, Lin JJ, Campbell KN, Hu L, Kale MS. Examining the Trajectory of Health-Related Quality of Life among Coronavirus Disease Patients. *J Gen Intern Med*. 2024;39(10):1820–7. <https://doi.org/10.1007/s11606-023-08575-9> PMID: [38169022](https://pubmed.ncbi.nlm.nih.gov/38169022/)
56. Naik H, Wilton J, Tran KC, Janjua NZ, Levin A, Zhang W. Long-Term Health-Related Quality of Life in Working-Age COVID-19 Survivors: A Cross-Sectional Study. *The American Journal of Medicine*. 2024.
57. O'Connor RJ, Preston N, Parkin A, Makower S, Ross D, Gee J. The COVID-19 Yorkshire Rehabilitation Scale (C19-YRS): Application and psychometric analysis in a post-COVID-19 syndrome cohort. *J Med Virol*. 2022;94(3):1027–34.
58. Shah NS, Huffman MD, Schneider JA, Khan SS, Siddique J, Kanaya AM, et al. Association of Social Network Characteristics With Cardiovascular Health and Coronary Artery Calcium in South Asian Adults in the United States: The MASALA Cohort Study. *J Am Heart Assoc*. 2021;10(7):e019821. <https://doi.org/10.1161/JAHA.120.019821> PMID: [33759541](https://pubmed.ncbi.nlm.nih.gov/33759541/)
59. Jones LM, Hawkins J, Mitchell J, Wright KD, Cuffee Y. Health Social Networks of Black Women With Hypertension. *Nurs Res*. 2023;72(6):489–94. <https://doi.org/10.1097/NNR.0000000000000679> PMID: [37890162](https://pubmed.ncbi.nlm.nih.gov/37890162/)
60. Williams DR, Yan Yu, Jackson JS, Anderson NB. Racial Differences in Physical and Mental Health: Socio-economic Status, Stress and Discrimination. *J Health Psychol*. 1997;2(3):335–51. <https://doi.org/10.1177/135910539700200305> PMID: [22013026](https://pubmed.ncbi.nlm.nih.gov/22013026/)
61. Hicken MT, Lee H, Ailshire J, Burgard SA, Williams DR. "Every shut eye, ain't sleep": The role of racism-related vigilance in racial/ethnic disparities in sleep difficulty. *Race Soc Probl*. 2013;5(2):100–12. <https://doi.org/10.1007/s12552-013-9095-9> PMID: [23894254](https://pubmed.ncbi.nlm.nih.gov/23894254/)
62. Himmelstein MS, Young DM, Sanchez DT, Jackson JS. Vigilance in the discrimination-stress model for Black Americans. *Psychol Health*. 2015;30(3):253–67. <https://doi.org/10.1080/08870446.2014.966104> PMID: [25247925](https://pubmed.ncbi.nlm.nih.gov/25247925/)
63. Utsey SO. Development and validation of a short form of the Index of Race-Related Stress (IRRS)—Brief Version. *Measurement and Evaluation in Counseling and Development*. 1999;32(3):149–67.
64. Piercy KL, Troiano RP, Ballard RM, Carlson SA, Fulton JE, Galuska DA, et al. The Physical Activity Guidelines for Americans. *JAMA*. 2018;320(19):2020–8. <https://doi.org/10.1001/jama.2018.14854> PMID: [30418471](https://pubmed.ncbi.nlm.nih.gov/30418471/)
65. Gardner AW, Montgomery PS, Wang M, Shen B. Minimal clinically important differences in daily physical activity outcomes following supervised and home-based exercise in peripheral artery disease. *Vasc Med*. 2022;27(2):142–9.
66. Bell CN, Holder MB. The Interrelationship between Race, Social Norms, and Dietary Behaviors among College-attending Women. *Am J Health Behav*. 2019;43(1):23–36. <https://doi.org/10.5993/AJHB.43.1.3> PMID: [30522564](https://pubmed.ncbi.nlm.nih.gov/30522564/)
67. Machado FVC, Meys R, Delbressine JM, Vaes AW, Goertz YMJ, van Herck M, et al. Construct validity of the Post-COVID-19 Functional Status Scale in adult subjects with COVID-19. *Health Qual Life Outcomes*. 2021;19(1):40. <https://doi.org/10.1186/s12955-021-01691-2> PMID: [33536042](https://pubmed.ncbi.nlm.nih.gov/33536042/)
68. Ziauddeen N, Gurdasani D, O'Hara ME, Hastie C, Roderick P, Yao G, et al. Characteristics and impact of Long Covid: Findings from an online survey. *PLoS One*. 2022;17(3):e0264331. <https://doi.org/10.1371/journal.pone.0264331> PMID: [35259179](https://pubmed.ncbi.nlm.nih.gov/35259179/)
69. Wilbur J, Braun LT, Arslanian-Engoren C, Lauver DR, Holloway S. Assessing and addressing cardiovascular risk in young women. *Nurs Outlook*. 2018;66(3):325–8.
70. Stone NJ, Smith SC Jr, Orringer CE, Rigotti NA, Navar AM, Khan SS, et al. Managing Atherosclerotic Cardiovascular Risk in Young Adults: JACC State-of-the-Art Review. *J Am Coll Cardiol*. 2022;79(8):819–36. <https://doi.org/10.1016/j.jacc.2021.12.016> PMID: [35210038](https://pubmed.ncbi.nlm.nih.gov/35210038/)
71. Office of the U.S. Surgeon General. Our epidemic of loneliness and isolation, the U.S. Surgeon General's advisory on the healing effects of social connection and community. 2023.
72. Krivitsky PN, Morris M. Inference for social network models from egocentrically sampled data, with application to understanding persistent racial disparities in hiv prevalence in the US. *Ann Appl Stat*. 2017;11(1):427–55. <https://doi.org/10.1214/16-AOAS1010> PMID: [29276550](https://pubmed.ncbi.nlm.nih.gov/29276550/)
